# Supplementary material for: Coupling the Cardiac Voltage-Gated Sodium Channel to Channelrhodopsin-2 Generates Novel Optical Switches for Action Potential Studies
Source: Membranes (Basel). 2022 Sep 20;12(10):907. doi: 10.3390/membranes12100907 (PMC9607247; doi:10.3390/membranes12100907)
Supplement: Supplementary file 1 [file membranes-12-00907-s001.zip › membranes-1859283-supplementary.pdf]

## Construction of Na<sub>v</sub>1.5/ChR2 heteromers

To construct Na<sub>v</sub>1.5-CC-1, we first removed the YFP stop codon in pEYFP-hH1 [1] by mutagenesis PCR. The corresponding primer was designed to incorporate triplet TTA instead of TAA as well as palindromic sequences for the restriction sites *PacI* and *NotI*. Both sites in the respectively modified pEYFP-hH1 plasmid were used to insert the ChR2-ChR2 dimer, amplified by PCR from pGEM-β1-ChR2-ChR2 [2]. Forward and reverse primers, containing *PacI* and *NotI* sequences, respectively, were designed to allow also for amplification of the flanking linker GGGG-GGGG-GGGG ([GGGS]<sub>3</sub>), and the transmembrane region A<sub>2</sub> to N<sub>103</sub> of the β subunit of the human H<sup>+</sup>/K<sup>+</sup>-ATPase (hβHK<sub>A2-N103</sub>; accession number NM\_000705). The resulting full-length Na<sub>v</sub>1.5-CC-1 sequence was finally inserted in two separate cloning steps as *BclI/XbaI* and *XbaI/HindIII* fragments into the *BamHI/HindIII* sites of pGEMHEnew [3]. The resulting plasmid, pGEM-Na<sub>v</sub>1.5-YCC, was expected to encode the following heteromeric channel protein: Na<sub>v</sub>1.5<sub>M1-V2016</sub>-YFP<sub>M1-K239</sub>-[LINTGVQVAE]-[GGGS]<sub>3</sub>-hβHK<sub>A2-N103</sub>-[GGGS]<sub>3</sub>-ChR2/T159C<sub>N24-V309</sub>-GGGSR[GGGS]<sub>2</sub>-hβHK<sub>A2-N103</sub>-[GGGS]<sub>3</sub>-ChR2/T159C<sub>N24-V309</sub> (see Na<sub>v</sub>1.5-CC-1 in Fig. 1).

For the N-terminal linkage of the ChR2 dimer to human Na<sub>v</sub>1.5, leading to CC-Na<sub>v</sub>1.5, we first coupled EGFP in-frame to the Na<sub>v</sub>1.5 start codon by recombinant PCR. The full-length EGFP-Na<sub>v</sub>1.5 fragment was inserted into the *HindIII/NotI* sites of pcDNA3, resulting in plasmid pcDNA-GFP-hNa<sub>v</sub>1.5. As the next step, the ChR2 sequence was amplified by PCR from plasmid pGEM-β1-ChR2-YFP [2]. The corresponding forward primer annealed in the upstream hβHK<sub>A2-N103</sub> sequence and contained the *HindIII* and *PacI* sites for the subsequent insertion of the second ChR2 sequence. The reverse primer annealed in the 3'-sequence of the Golgi-to-plasma membrane trafficking signal (peptide [KSRITSEGEYIPLDQIDINVVDTSR]) [4] and the adjacent first YFP triplets. The resulting 1.4 kb PCR fragment was fused in-frame by a recombinant PCR step to the start codon of EGFP in pcDNA-GFP-hNa<sub>v</sub>1.5, leading to pcDNA-GFP-hNa<sub>v</sub>1.5/PacC. In a third cloning step, the ChR2 sequence was first amplified by a single PCR step from pGEMHE-ChR2-T159C::YFP [5,6]. Forward and reverse primers contained *HindIII* and *PacI* sites, respectively, so that the amplified ChR2 sequence could be coupled in-frame to the ChR2-GFP-hNa<sub>v</sub>1.5 sequence of pcDNA-GFP-hNa<sub>v</sub>1.5/PacC. The resulting plasmid pcDNA-ChR2-ChR2-GFP-hNa<sub>v</sub>1.5 contained the full-length CC-Na<sub>v</sub>1.5 cDNA sequence. For cRNA production, we had to insert this 11.4 kb fragment into the *HindIII/NotI* sites of pGEMHEnew. The CC-Na<sub>v</sub>1.5 amino sequence in the resulting plasmid pGEM-ChR2-ChR2-GFP-hNa<sub>v</sub>1.5 is as follows: ChR2/T159C<sub>M1-V309</sub>-[LINGGS]-hβHK<sub>A2-N103</sub>-[GGGS]<sub>3</sub>-ChR2/T159C<sub>D2-V309</sub>-[KSRITSEGEYIPLDQIDINVVDTSR]-EGFP<sub>M1-K239</sub>-Na<sub>v</sub>1.5<sub>M1-V2016</sub> (see CC-Na<sub>v</sub>1.5 in Fig. 1).

To obtain Na<sub>v</sub>1.5-CC-5, we first removed the Chr2 stop codon in pTSV40G-hNa<sub>v</sub>1.5-ChR2, encoding fusion channel hNa<sub>v</sub>1.5-ChR2<sub>D2-V309</sub>, by mutagenesis PCR (for pTSV40G-hNa<sub>v</sub>1.5-ChR2, encoding the similar variant hNa<sub>v</sub>1.5-ChR2<sub>N24-V309</sub>, see [2]). The corresponding forward primer annealed in the hNa<sub>v</sub>1.5 sequence upstream to the unique *Tth111I* site. The reverse primer was designed to incorporate triplet TTA instead of TAA as well as sequences for the restriction sites *PacI* and *NotI*. The 1.7 bp PCR fragment was inserted into the *Tth111I/NotI* sites of pTSV40G-hNa<sub>v</sub>1.5-ChR2, resulting in pTSV40G-hNa<sub>v</sub>1.5-ChR2/*Pac*. Next, we amplified by PCR the coding region for VQVAE-[GGGS]<sub>3</sub>-hβHK<sub>A2-N103</sub>-[GGGS]<sub>3</sub>-Chr2/T159C<sub>N24-V309</sub>-[KSRITSEGEYIPLDQIDINVVDTSR]-YFP<sub>M1-K239</sub>-[SRFCYENEV] from pGEM-β1-ChR2-YFP [2]. The Golgi-to-plasma membrane trafficking signal peptide [KSRITSEGEYIPLDQIDINVVDTSR] [4] and the ER export motif [SRFCYENEV] [7] were previously incorporated into the β1-ChR2-YFP construct in order to increase the channel number in the plasma membrane [2]. The corresponding forward primer contained a *PacI* site; the reverse primer annealed in the 3'-non-coding region of the β-globin sequence of pGEMHEnew and contained a *NotI* site. The resulting 2.3 kb PCR fragment was digested with *PacI* and *NotI*, and inserted into the same sites of pTSV40G-hNa<sub>v</sub>1.5-ChR2/*Pac*. The resulting plasmid, pTSV40G-hNa<sub>v</sub>1.5-ChR2-ChR2-YFP, was used to produce the Na<sub>v</sub>1.5-CC-5 cRNA, and finally the following channel protein: Na<sub>v</sub>1.5<sub>M1-V2016</sub>-[GGGS]<sub>3</sub>-hβHK<sub>A2-N103</sub>-[GGGS]<sub>3</sub>-Chr2/T159C<sub>D2-V309</sub>-[LINVQVAE]-[GGGS]<sub>3</sub>-hβHK<sub>A2-N103</sub>-[GGGS]<sub>3</sub>-Chr2/T159C<sub>N24-V309</sub>-[KSRITSEGEYIPLDQIDINVVDTSR]-YFP<sub>M1-K239</sub>-[SRFCYENEV] (see Na<sub>v</sub>1.5-CC-5 in Fig. 1).

For the construction of Na<sub>v</sub>1.5-CC-4, the ER export motif [SRFCYENEV] of Na<sub>v</sub>1.5-CC-5 was deleted in pTSV40G-hNa<sub>v</sub>1.5-ChR2-ChR2-YFP by recombinant PCR. The amino sequence, encoded by the resulting plasmid pTSV40G-hNa<sub>v</sub>1.5-ChR2-ChR2-YFP0, is as follows: Na<sub>v</sub>1.5<sub>M1-V2016</sub>-[GGGS]<sub>3</sub>-hβHK<sub>A2-N103</sub>-[GGGS]<sub>3</sub>-Chr2/T159C<sub>D2-V309</sub>-[LINVQVAE]-[GGGS]<sub>3</sub>-hβHK<sub>A2-N103</sub>-[GGGS]<sub>3</sub>-Chr2/T159C<sub>N24-V309</sub>-[KSRITSEGEYIPLDQIDINVVDTSR]-YFP<sub>M1-K239</sub> (see Na<sub>v</sub>1.5-CC-4 in Fig. 1).

To obtain Na<sub>v</sub>1.5-CC-3, we used plasmid pTSV40G-hNa<sub>v</sub>1.5-ChR2-ChR2-YFP as a PCR template to amplify a 1.4 kb fragment, encoding the following protein sequence: TGVQVAE-[GGGS]<sub>3</sub>-hβHK<sub>A2-N103</sub>-[GGGS]<sub>3</sub>-Chr2/T159C<sub>N24-V309</sub>-[KSRITSEGEYIPLDQIDINVVDTSR]-MVSKG. Forward and reverse primers contained restriction sites *PacI* and *XbaI*, respectively, so that the resulting PCR product could be inserted in-frame into the same sites of pGEM-Na<sub>v</sub>1.5-YCC (see cloning for Na<sub>v</sub>1.5-CC-1 above). The resulting plasmid, pGEM-Na<sub>v</sub>1.5-YC-ts-C, allowed for the production of the Na<sub>v</sub>1.5-CC-3 cRNA, encoding the following fusion channel: Na<sub>v</sub>1.5<sub>M1-V2016</sub>-YFP<sub>M1-K239</sub>-[LINTGVQVAE]-[GGGS]<sub>3</sub>-hβHK<sub>A2-N103</sub>-[GGGS]<sub>3</sub>-Chr2/T159C<sub>N24-V309</sub>-[KSRITSEGEYIPLDQIDINVVDTSR]-[GGGS]<sub>2</sub>-hβHK<sub>A2-N103</sub>-[GGGS]<sub>3</sub>-Chr2/T159C<sub>N24-V309</sub> (see Na<sub>v</sub>1.5-CC-3 in Fig. 1).

To obtain Na<sub>v</sub>1.5-CC-2, we inserted by a recombinant PCR approach the sequence for the Golgi-to-plasma membrane trafficking peptide (see above) in-frame between the Na<sub>v</sub>1.5 and YFP sequences in plasmid pGEM-Na<sub>v</sub>1.5-YCC (see cloning for Na<sub>v</sub>1.5-CC-1). The Na<sub>v</sub>1.5-CC-2 amino sequence in the resulting plasmid pGEM-hNa<sub>v</sub>1.5-ts-YCC is as follows:

Na<sub>v</sub>1.5<sub>M1-V2016</sub>-[KSRITSEGEYIPLDQIDINVVDTSR]-YFP<sub>M1-K239</sub>-[LINTGVQVAE]-[GGGS]<sub>3</sub>-hβHK<sub>A2-N103</sub>-[GGGS]<sub>3</sub>-Chr2/T159C<sub>N24-V309</sub>-GGGSR[GGGS]<sub>2</sub>-hβHK<sub>A2-N103</sub>-[GGGS]<sub>3</sub>-Chr2/T159C<sub>N24-V309</sub> (see Na<sub>v</sub>1.5-CC-1 in Fig. 1).

## References

1. Zimmer, T.; Biskup, C.; Dugarmaa, S.; Vogel, F.; Steinbis, M.; Bohle, T.; Wu, Y.S.; Dumaine, R.; Benndorf, K. Functional expression of GFP-linked human heart sodium channel (hH1) and subcellular localization of the  $\alpha$  subunit in HEK293 cells and dog cardiac myocytes. *J Membr Biol* **2002**, *186*, 1-12.
2. Walther, F.; Feind, D.; Vom Dahl, C.; Muller, C.E.; Kukaj, T.; Sattler, C.; Nagel, G.; Gao, S.; Zimmer, T. Action potentials in *Xenopus* oocytes triggered by blue light. *The Journal of general physiology* **2020**, *152*, doi:10.1085/jgp.201912489.
3. Liman, E.R.; Tytgat, J.; Hess, P. Subunit stoichiometry of a mammalian K<sup>+</sup> channel determined by construction of multimeric cDNAs. *Neuron* **1992**, *9*, 861-871.
4. Hofherr, A.; Fakler, B.; Klocker, N. Selective Golgi export of Kir2.1 controls the stoichiometry of functional Kir2.x channel heteromers. *Journal of cell science* **2005**, *118*, 1935-1943, doi:10.1242/jcs.02322.
5. Berndt, A.; Schoenenberger, P.; Mattis, J.; Tye, K.M.; Deisseroth, K.; Hegemann, P.; Oertner, T.G. High-efficiency channelrhodopsins for fast neuronal stimulation at low light levels. *Proc Natl Acad Sci U S A* **2011**, *108*, 7595-7600, doi:10.1073/pnas.1017210108.
6. Ullrich, S.; Gueta, R.; Nagel, G. Degradation of channelopsin-2 in the absence of retinal and degradation resistance in certain mutants. *Biological chemistry* **2013**, *394*, 271-280, doi:10.1515/hsz-2012-0256.
7. Stockklauser, C.; Ludwig, J.; Ruppersberg, J.P.; Klocker, N. A sequence motif responsible for ER export and surface expression of Kir2.0 inward rectifier K(+) channels. *FEBS Lett* **2001**, *493*, 129-133.

**Table S1. Supplementary statistical AP and oocyte parameters.** Oocytes with sub-threshold depolarization were excluded.

| Channel constructs                            | Peak Na <sup>+</sup> current | Peak photocurrent | K <sup>+</sup> current at |           | Oocyte features   |                     | Number of oocyte batches | Number of measurements |
|-----------------------------------------------|------------------------------|-------------------|---------------------------|-----------|-------------------|---------------------|--------------------------|------------------------|
|                                               | (μA)                         | (μA)              | 10 mV                     | 30 mV     | Resting potential | Membrane resistance |                          |                        |
|                                               |                              |                   | (μA)                      | (μA)      | (mV)              | (MΩ)                |                          |                        |
| Na <sub>v</sub> 1.5-CC-2                      | 15.58±0.66                   | 0.37±0.03         | -                         | -         | -20.58±1.02       | 0.96±0.07           | 8                        | 12                     |
| Na <sub>v</sub> 1.5-CC-5                      | 18.02±0.53*                  | 0.22±0.02*        | -                         | -         | -25.67±0.40       | 1.03±0.09           | 4                        | 12                     |
| Na <sub>v</sub> 1.5-CC-2 + K <sub>v</sub> 1.2 | 15.99±0.95                   | 0.62±0.04*        | 3.00±0.25                 | 4.25±0.39 | -30.80±0.53*      | 0.79±0.04*          | 5                        | 15                     |
| Na <sub>v</sub> 1.5-CC-2 + hERG               | 13.49±0.47*                  | 0.47±0.02*        | 1.97±0.13                 | 2.04±0.13 | -49.94±0.62*      | 0.52±0.02*          | 5                        | 16                     |
| Na <sub>v</sub> 1.5-CC-ΔKPQ                   | 11.27±0.53*                  | 0.51±0.03*        | -                         | -         | -16.17±0.74*      | 0.94±0.05           | 6                        | 18                     |

\* indicates p<0.05 *versus* Na<sub>v</sub>1.5-CC-2

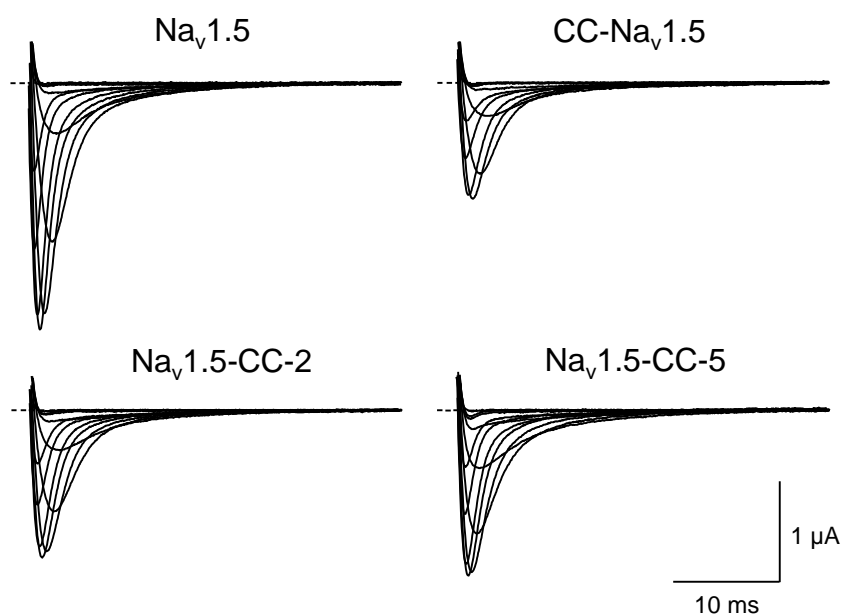

**Figure S1. Representative  $\text{Na}^+$  current families of wild-type  $\text{Na}_v1.5$  and three fusion channels.** Whole-cell currents were recorded three days after cRNA injection at a test potential between -80 and -45 mV (holding potential -100 mV). For the injected cRNA amount and detailed statistics on  $\text{Na}^+$  channel kinetics see Table 2.
